# Supplementary material
Source: Springer Nature journal article supplement (https://www.springermedizin.de/resource/supplementary/12937_2013_757_MOESM1_ESM.pdf/25653992)
Supplement: MOESM1 [file 25653992]

**Superfamily of nuclear hormone receptors**

```
graph TD; A[Superfamily of nuclear hormone receptors] --> B[Thyroid hormone receptor - THR]; A --> C[Steroid hormones receptors]; A --> D[vitamin D3 receptor - VDR]; A --> E[retinoid acid receptor - RAR]; A --> F[peroxisome proliferator-activated receptor - PPAR];
```

Thyroid hormone receptor - THR

Steroid hormones receptors

vitamin D3 receptor - VDR

retinoid acid receptor - RAR

peroxisome proliferator-activated receptor - PPAR
